# Supplementary material
Source: MDPI journal article supplement (https://www.mdpi.com/2076-3417/14/9/3704)
Supplement: s1 [file s1]

**Supplementary Table S1: Information on water yam genotypes**

| <b>Ascension</b> | <b>Location</b> | <b>Reps</b> |
|------------------|-----------------|-------------|
| TDa0000194       | Ibadan          | 1           |
| TDa0000194       | Ibadan          | 2           |
| TDa0100029       | Ibadan          | 1           |
| TDa0100029       | Ibadan          | 2           |
| TDa0100299       | Ibadan          | 1           |
| TDa0100299       | Ibadan          | 2           |
| TDa0500056       | Ibadan          | 1           |
| TDa0500056       | Ibadan          | 2           |
| TDa0700015       | Ibadan          | 1           |
| TDa0700015       | Ibadan          | 2           |
| TDa0700135       | Ibadan          | 1           |
| TDa0700135       | Ibadan          | 2           |
| TDa0700154       | Ibadan          | 1           |
| TDa0700154       | Ibadan          | 2           |
| TDa0800007       | Ibadan          | 1           |
| TDa0800007       | Ibadan          | 2           |
| TDa0900026       | Ibadan          | 1           |
| TDa0900026       | Ibadan          | 2           |
| TDa0900128       | Ibadan          | 1           |
| TDa0900128       | Ibadan          | 2           |
| TDa0900217       | Ibadan          | 1           |
| TDa0900217       | Ibadan          | 2           |
| TDa0900554       | Ibadan          | 1           |
| TDa0900554       | Ibadan          | 2           |
| TDa0900602       | Ibadan          | 1           |
| TDa0900602       | Ibadan          | 2           |
| TDa1000169       | Ibadan          | 1           |
| TDa1000169       | Ibadan          | 2           |
| TDa1000592       | Ibadan          | 1           |
| TDa1000592       | Ibadan          | 2           |
| TDa1000918       | Ibadan          | 1           |
| TDa1000918       | Ibadan          | 2           |
| TDa1000994       | Ibadan          | 1           |
| TDa1000994       | Ibadan          | 2           |
| TDa1100193       | Ibadan          | 1           |
| TDa1100193       | Ibadan          | 2           |
| TDa1100201       | Ibadan          | 1           |
| TDa1100201       | Ibadan          | 2           |
| TDa1100202       | Ibadan          | 1           |
| TDa1100202       | Ibadan          | 2           |
| TDa1100203       | Ibadan          | 1           |

---

|            |        |   |
|------------|--------|---|
| TDa1100203 | Ibadan | 2 |
| TDa1100204 | Ibadan | 1 |
| TDa1100204 | Ibadan | 2 |
| TDa1100228 | Ibadan | 1 |
| TDa1100228 | Ibadan | 2 |
| TDa1100242 | Ibadan | 1 |
| TDa1100242 | Ibadan | 2 |
| TDa1100248 | Ibadan | 1 |
| TDa1100248 | Ibadan | 2 |
| TDa1100264 | Ibadan | 1 |
| TDa1100264 | Ibadan | 2 |
| TDa1100283 | Ibadan | 1 |
| TDa1100283 | Ibadan | 2 |
| TDa1100295 | Ibadan | 1 |
| TDa1100295 | Ibadan | 2 |
| TDa1100299 | Ibadan | 1 |
| TDa1100299 | Ibadan | 2 |
| TDa1100300 | Ibadan | 1 |
| TDa1100300 | Ibadan | 2 |
| TDa1100317 | Ibadan | 1 |
| TDa1100317 | Ibadan | 2 |
| TDa1100414 | Ibadan | 1 |
| TDa1100414 | Ibadan | 2 |
| TDa1100432 | Ibadan | 1 |
| TDa1100432 | Ibadan | 2 |
| TDa1100462 | Ibadan | 1 |
| TDa1100462 | Ibadan | 2 |
| TDa1400051 | Ibadan | 1 |
| TDa1400051 | Ibadan | 2 |
| TDa1400062 | Ibadan | 1 |
| TDa1400062 | Ibadan | 2 |
| TDa1400064 | Ibadan | 1 |
| TDa1400064 | Ibadan | 2 |
| TDa1400301 | Ibadan | 1 |
| TDa1400301 | Ibadan | 2 |
| TDa1400367 | Ibadan | 1 |
| TDa1400367 | Ibadan | 2 |
| TDa1400380 | Ibadan | 1 |
| TDa1400380 | Ibadan | 2 |
| TDa1400432 | Ibadan | 1 |
| TDa1400432 | Ibadan | 2 |
| TDa1400911 | Ibadan | 1 |
| TDa1400911 | Ibadan | 2 |
| TDa1401132 | Ibadan | 1 |

---

|            |        |   |
|------------|--------|---|
| TDa1401132 | Ibadan | 2 |
| TDa1401162 | Ibadan | 1 |
| TDa1401162 | Ibadan | 2 |
| TDa1401249 | Ibadan | 1 |
| TDa1401249 | Ibadan | 2 |
| TDa1401253 | Ibadan | 1 |
| TDa1401253 | Ibadan | 2 |
| TDa1401270 | Ibadan | 1 |
| TDa1401270 | Ibadan | 2 |
| TDa1401276 | Ibadan | 1 |
| TDa1401276 | Ibadan | 2 |
| TDa1401319 | Ibadan | 1 |
| TDa1401319 | Ibadan | 2 |
| TDa1401400 | Ibadan | 1 |
| TDa1401400 | Ibadan | 2 |
| TDa1401409 | Ibadan | 1 |
| TDa1401409 | Ibadan | 2 |
| TDa1401619 | Ibadan | 1 |
| TDa1401619 | Ibadan | 2 |
| TDa1401684 | Ibadan | 1 |
| TDa1401684 | Ibadan | 2 |
| TDa1402043 | Ibadan | 1 |
| TDa1402043 | Ibadan | 2 |
| TDa8701091 | Ibadan | 1 |
| TDa8701091 | Ibadan | 2 |
| TDa92:2    | Ibadan | 1 |
| TDa92:2    | Ibadan | 2 |
| TDa9801174 | Ibadan | 1 |
| TDa9801174 | Ibadan | 2 |
| TDa9900240 | Ibadan | 1 |
| TDa9900240 | Ibadan | 2 |
| TDa0000194 | Ikenne | 1 |
| TDa0000194 | Ikenne | 2 |
| TDa0100029 | Ikenne | 1 |
| TDa0100029 | Ikenne | 2 |
| TDa0100299 | Ikenne | 1 |
| TDa0100299 | Ikenne | 2 |
| TDa0500056 | Ikenne | 1 |
| TDa0500056 | Ikenne | 2 |
| TDa0700015 | Ikenne | 1 |
| TDa0700015 | Ikenne | 2 |
| TDa0700135 | Ikenne | 1 |
| TDa0700135 | Ikenne | 2 |
| TDa0700154 | Ikenne | 1 |

---

|            |        |   |
|------------|--------|---|
| TDa0700154 | Ikenne | 2 |
| TDa0800007 | Ikenne | 1 |
| TDa0800007 | Ikenne | 2 |
| TDa0900026 | Ikenne | 1 |
| TDa0900026 | Ikenne | 2 |
| TDa0900128 | Ikenne | 1 |
| TDa0900128 | Ikenne | 2 |
| TDa0900217 | Ikenne | 1 |
| TDa0900217 | Ikenne | 2 |
| TDa0900554 | Ikenne | 1 |
| TDa0900554 | Ikenne | 2 |
| TDa0900602 | Ikenne | 1 |
| TDa0900602 | Ikenne | 2 |
| TDa1000169 | Ikenne | 1 |
| TDa1000169 | Ikenne | 2 |
| TDa1000592 | Ikenne | 1 |
| TDa1000592 | Ikenne | 2 |
| TDa1000918 | Ikenne | 1 |
| TDa1000918 | Ikenne | 2 |
| TDa1000994 | Ikenne | 1 |
| TDa1000994 | Ikenne | 2 |
| TDa1100193 | Ikenne | 1 |
| TDa1100193 | Ikenne | 2 |
| TDa1100201 | Ikenne | 1 |
| TDa1100201 | Ikenne | 2 |
| TDa1100202 | Ikenne | 1 |
| TDa1100202 | Ikenne | 2 |
| TDa1100203 | Ikenne | 1 |
| TDa1100203 | Ikenne | 2 |
| TDa1100204 | Ikenne | 1 |
| TDa1100204 | Ikenne | 2 |
| TDa1100228 | Ikenne | 1 |
| TDa1100228 | Ikenne | 2 |
| TDa1100242 | Ikenne | 1 |
| TDa1100242 | Ikenne | 2 |
| TDa1100248 | Ikenne | 1 |
| TDa1100248 | Ikenne | 2 |
| TDa1100264 | Ikenne | 1 |
| TDa1100264 | Ikenne | 2 |
| TDa1100283 | Ikenne | 1 |
| TDa1100283 | Ikenne | 2 |
| TDa1100295 | Ikenne | 1 |
| TDa1100295 | Ikenne | 2 |
| TDa1100299 | Ikenne | 1 |

---

|            |        |   |
|------------|--------|---|
| TDa1100299 | Ikenne | 2 |
| TDa1100300 | Ikenne | 1 |
| TDa1100300 | Ikenne | 2 |
| TDa1100317 | Ikenne | 1 |
| TDa1100317 | Ikenne | 2 |
| TDa1100414 | Ikenne | 1 |
| TDa1100414 | Ikenne | 2 |
| TDa1100432 | Ikenne | 1 |
| TDa1100432 | Ikenne | 2 |
| TDa1100462 | Ikenne | 1 |
| TDa1100462 | Ikenne | 2 |
| TDa1400051 | Ikenne | 1 |
| TDa1400051 | Ikenne | 2 |
| TDa1400062 | Ikenne | 1 |
| TDa1400062 | Ikenne | 2 |
| TDa1400064 | Ikenne | 1 |
| TDa1400064 | Ikenne | 2 |
| TDa1400301 | Ikenne | 1 |
| TDa1400301 | Ikenne | 2 |
| TDa1400367 | Ikenne | 1 |
| TDa1400367 | Ikenne | 2 |
| TDa1400380 | Ikenne | 1 |
| TDa1400380 | Ikenne | 2 |
| TDa1400432 | Ikenne | 1 |
| TDa1400432 | Ikenne | 2 |
| TDa1400911 | Ikenne | 1 |
| TDa1400911 | Ikenne | 2 |
| TDa1401132 | Ikenne | 1 |
| TDa1401132 | Ikenne | 2 |
| TDa1401162 | Ikenne | 1 |
| TDa1401162 | Ikenne | 2 |
| TDa1401249 | Ikenne | 1 |
| TDa1401249 | Ikenne | 2 |
| TDa1401253 | Ikenne | 1 |
| TDa1401253 | Ikenne | 2 |
| TDa1401270 | Ikenne | 1 |
| TDa1401270 | Ikenne | 2 |
| TDa1401276 | Ikenne | 1 |
| TDa1401276 | Ikenne | 2 |
| TDa1401319 | Ikenne | 1 |
| TDa1401319 | Ikenne | 2 |
| TDa1401400 | Ikenne | 1 |
| TDa1401400 | Ikenne | 2 |
| TDa1401409 | Ikenne | 1 |

---

|            |        |   |
|------------|--------|---|
| TDa1401409 | Ikenne | 2 |
| TDa1401619 | Ikenne | 1 |
| TDa1401619 | Ikenne | 2 |
| TDa1401684 | Ikenne | 1 |
| TDa1401684 | Ikenne | 2 |
| TDa1402043 | Ikenne | 1 |
| TDa1402043 | Ikenne | 2 |
| TDa8701091 | Ikenne | 1 |
| TDa8701091 | Ikenne | 2 |
| TDa92:2    | Ikenne | 1 |
| TDa92:2    | Ikenne | 2 |
| TDa9801174 | Ikenne | 1 |
| TDa9801174 | Ikenne | 2 |
| TDa9900240 | Ikenne | 1 |
| TDa9900240 | Ikenne | 2 |
| TDa0000194 | Ubiaja | 1 |
| TDa0000194 | Ubiaja | 2 |
| TDa0100029 | Ubiaja | 1 |
| TDa0100029 | Ubiaja | 2 |
| TDa0100299 | Ubiaja | 1 |
| TDa0100299 | Ubiaja | 2 |
| TDa0500056 | Ubiaja | 1 |
| TDa0500056 | Ubiaja | 2 |
| TDa0700015 | Ubiaja | 1 |
| TDa0700015 | Ubiaja | 2 |
| TDa0700135 | Ubiaja | 1 |
| TDa0700135 | Ubiaja | 2 |
| TDa0700154 | Ubiaja | 1 |
| TDa0700154 | Ubiaja | 2 |
| TDa0800007 | Ubiaja | 1 |
| TDa0800007 | Ubiaja | 2 |
| TDa0900026 | Ubiaja | 1 |
| TDa0900026 | Ubiaja | 2 |
| TDa0900128 | Ubiaja | 1 |
| TDa0900128 | Ubiaja | 2 |
| TDa0900217 | Ubiaja | 1 |
| TDa0900217 | Ubiaja | 2 |
| TDa0900554 | Ubiaja | 1 |
| TDa0900554 | Ubiaja | 2 |
| TDa0900602 | Ubiaja | 1 |
| TDa0900602 | Ubiaja | 2 |
| TDa1000169 | Ubiaja | 1 |
| TDa1000169 | Ubiaja | 2 |
| TDa1000592 | Ubiaja | 1 |

---

|            |        |   |
|------------|--------|---|
| TDa1000592 | Ubiaja | 2 |
| TDa1000918 | Ubiaja | 1 |
| TDa1000918 | Ubiaja | 2 |
| TDa1000994 | Ubiaja | 1 |
| TDa1000994 | Ubiaja | 2 |
| TDa1100193 | Ubiaja | 1 |
| TDa1100193 | Ubiaja | 2 |
| TDa1100201 | Ubiaja | 1 |
| TDa1100201 | Ubiaja | 2 |
| TDa1100202 | Ubiaja | 1 |
| TDa1100202 | Ubiaja | 2 |
| TDa1100203 | Ubiaja | 1 |
| TDa1100203 | Ubiaja | 2 |
| TDa1100204 | Ubiaja | 1 |
| TDa1100204 | Ubiaja | 2 |
| TDa1100228 | Ubiaja | 1 |
| TDa1100228 | Ubiaja | 2 |
| TDa1100242 | Ubiaja | 1 |
| TDa1100242 | Ubiaja | 2 |
| TDa1100248 | Ubiaja | 1 |
| TDa1100248 | Ubiaja | 2 |
| TDa1100264 | Ubiaja | 1 |
| TDa1100264 | Ubiaja | 2 |
| TDa1100283 | Ubiaja | 1 |
| TDa1100283 | Ubiaja | 2 |
| TDa1100295 | Ubiaja | 1 |
| TDa1100295 | Ubiaja | 2 |
| TDa1100299 | Ubiaja | 1 |
| TDa1100299 | Ubiaja | 2 |
| TDa1100300 | Ubiaja | 1 |
| TDa1100300 | Ubiaja | 2 |
| TDa1100317 | Ubiaja | 1 |
| TDa1100317 | Ubiaja | 2 |
| TDa1100414 | Ubiaja | 1 |
| TDa1100414 | Ubiaja | 2 |
| TDa1100432 | Ubiaja | 1 |
| TDa1100432 | Ubiaja | 2 |
| TDa1100462 | Ubiaja | 1 |
| TDa1100462 | Ubiaja | 2 |
| TDa1400051 | Ubiaja | 1 |
| TDa1400051 | Ubiaja | 2 |
| TDa1400062 | Ubiaja | 1 |
| TDa1400062 | Ubiaja | 2 |
| TDa1400064 | Ubiaja | 1 |

---

|            |        |   |
|------------|--------|---|
| TDa1400064 | Ubiaja | 2 |
| TDa1400301 | Ubiaja | 1 |
| TDa1400301 | Ubiaja | 2 |
| TDa1400367 | Ubiaja | 1 |
| TDa1400367 | Ubiaja | 2 |
| TDa1400380 | Ubiaja | 1 |
| TDa1400380 | Ubiaja | 2 |
| TDa1400432 | Ubiaja | 1 |
| TDa1400432 | Ubiaja | 2 |
| TDa1400911 | Ubiaja | 1 |
| TDa1400911 | Ubiaja | 2 |
| TDa1401132 | Ubiaja | 1 |
| TDa1401132 | Ubiaja | 2 |
| TDa1401162 | Ubiaja | 1 |
| TDa1401162 | Ubiaja | 2 |
| TDa1401249 | Ubiaja | 1 |
| TDa1401249 | Ubiaja | 2 |
| TDa1401253 | Ubiaja | 1 |
| TDa1401253 | Ubiaja | 2 |
| TDa1401270 | Ubiaja | 1 |
| TDa1401270 | Ubiaja | 2 |
| TDa1401276 | Ubiaja | 1 |
| TDa1401276 | Ubiaja | 2 |
| TDa1401319 | Ubiaja | 1 |
| TDa1401319 | Ubiaja | 2 |
| TDa1401400 | Ubiaja | 1 |
| TDa1401400 | Ubiaja | 2 |
| TDa1401409 | Ubiaja | 1 |
| TDa1401409 | Ubiaja | 2 |
| TDa1401619 | Ubiaja | 1 |
| TDa1401619 | Ubiaja | 2 |
| TDa1401684 | Ubiaja | 1 |
| TDa1401684 | Ubiaja | 2 |
| TDa1402043 | Ubiaja | 1 |
| TDa1402043 | Ubiaja | 2 |
| TDa8701091 | Ubiaja | 1 |
| TDa8701091 | Ubiaja | 2 |
| TDa92:2    | Ubiaja | 1 |
| TDa92:2    | Ubiaja | 2 |
| TDa9801174 | Ubiaja | 1 |
| TDa9801174 | Ubiaja | 2 |
| TDa9900240 | Ubiaja | 1 |
| TDa9900240 | Ubiaja | 2 |



---

**Supplementary Table S2: Information on white yam and landraces genotypes**

| <b>Ascension</b> | <b>Location</b> | <b>Rep</b> |
|------------------|-----------------|------------|
| TDr Ojuiyawo     | Ibadan          | 1          |
| TDr Ojuiyawo     | Ibadan          | 2          |
| TDr Mecca kusa   | Ibadan          | 1          |
| TDr Mecca kusa   | Ibadan          | 2          |
| TDr 1000793      | Ibadan          | 1          |
| TDr 1000793      | Ibadan          | 2          |
| TDr 1100055      | Ibadan          | 1          |
| TDr 1100055      | Ibadan          | 2          |
| TDr 1100490      | Ibadan          | 1          |
| TDr 1100490      | Ibadan          | 2          |
| TDr 1400359      | Ibadan          | 1          |
| TDr 1400359      | Ibadan          | 2          |
| TDr 1401220      | Ibadan          | 1          |
| TDr 1401220      | Ibadan          | 2          |
| TDr Ojuiyawo     | Ikenne          | 1          |
| TDr Ojuiyawo     | Ikenne          | 2          |
| TDr Mecca kusa   | Ikenne          | 1          |
| TDr Mecca kusa   | Ikenne          | 2          |
| TDr 1000793      | Ikenne          | 1          |
| TDr 1000793      | Ikenne          | 2          |
| TDr 1100055      | Ikenne          | 1          |
| TDr 1100055      | Ikenne          | 2          |
| TDr 1100490      | Ikenne          | 1          |
| TDr 1100490      | Ikenne          | 2          |
| TDr 1400359      | Ikenne          | 1          |
| TDr 1400359      | Ikenne          | 2          |
| TDr 1401220      | Ikenne          | 1          |
| TDr 1401220      | Ikenne          | 2          |
| TDr Ojuiyawo     | Ubiaja          | 1          |
| TDr Ojuiyawo     | Ubiaja          | 2          |
| TDr Mecca kusa   | Ubiaja          | 1          |
| TDr Mecca kusa   | Ubiaja          | 2          |
| TDr 1000793      | Ubiaja          | 1          |
| TDr 1000793      | Ubiaja          | 2          |

---

|             |        |   |
|-------------|--------|---|
| TDr 1100055 | Ubiaja | 1 |
| TDr 1100055 | Ubiaja | 2 |
| TDr 1100490 | Ubiaja | 1 |
| TDr 1100490 | Ubiaja | 2 |
| TDr 1400359 | Ubiaja | 1 |
| TDr 1400359 | Ubiaja | 2 |
| TDr 1401220 | Ubiaja | 1 |
| TDr 1401220 | Ubiaja | 2 |
